# Supplementary material for: Visual Outcome of Descemet Membrane Endothelial Keratoplasty during the Learning Curve in Initial Fifty Cases
Source: J Ophthalmol. 2019 Mar 17;2019:5921846. doi: 10.1155/2019/5921846 (PMC6441507; doi:10.1155/2019/5921846)
Supplement: Supplementary Materials — The data used to support the findings of this study are included within the supplementary information file. [file 5921846.f1.xlsx]

## Sheet: Sheet1
ot procedure	postop va 3mth	POVA_6	donor age	donor ECD	postop ecd 3m	cct
2	1	1	74	2558	2328	461
1	1	1	73	2571
1	3		57	2646	1050
1	2	2	73	2809	1040	616
1	2		45	2577
1	2	2	45	2950	1969	501
1	1		63	3067	889	438
1	2		68	2967	2275	573
1	2	2	41	2481	2275	555
1	2		58	2786	2336	497
1	1		60	3021	2085	473
1	1	2	53	3086
2	2		52	3021
1	2		45	2801
1	2		73	2703	2534	555
1	1		73	2653	2654	456
2	2		35	2577	1052	456
1	2		72	2427	689	503
1	2	1	47	2874	1649
1	2		33	3300	970	532
1	2	1	75	3484	2539	436
2	1		63	2950	1969	441
1	2		43	3509	2160	518
1	4		57	2801		409
1	2		35	2933	1696	449
1	1		74	2445	2010	448
1	2		46	2941	2746	512
1	3		75	3106	1040	593
1	2		52	3145
1	1		48	2890	1040	485
1	1	2	55	3012	1040	533
1	2		74	3040		402
1	2		74	3135	1731	507
1	1	1	74	2857	1590	470
1	1	1	45	3086	1570
1	1		75	3344	960	399
2	1		75	3356	2757	484
1	1		75	3040	2302	416
2	1		73	2959	2288	511
2	1	1	57	3236	2505	459
2	2		75	2703	753	492
2	2		45	2924	1600	511
2	1		55	2700	1900	520
Note: the seven cases of failed grafts have been removed for analysis from the master chart
